# Supplementary material for: Polarization enhanced photoresponse of InSe via 2D ferroelectric CuCrP 2 S 6
Source: Royal Society of Chemistry journal article supplement (doi:10.1039/d3ra05888c), 2023-01-01
Supplement: d3ra05888c1.pdf [file d3ra05888c1.pdf]

## Electronic supplementary information

### Polarization enhanced photoresponse of InSe via 2D ferroelectric CuCrP<sub>2</sub>S<sub>6</sub>

Xiaoliang Weng, Lu Qi, Wei Tang, Muhammad Ahsan Iqbal, Chenxu Kang, Kewen Wu, Yu-Jia Zeng\*

Key Laboratory of Optoelectronic Devices and Systems of Ministry of Education and Guangdong

Province, College of Physics and Optoelectronic Engineering, Shenzhen University, Shenzhen

518052, Guangdong, China

E-mail: yjzeng@szu.edu.cn

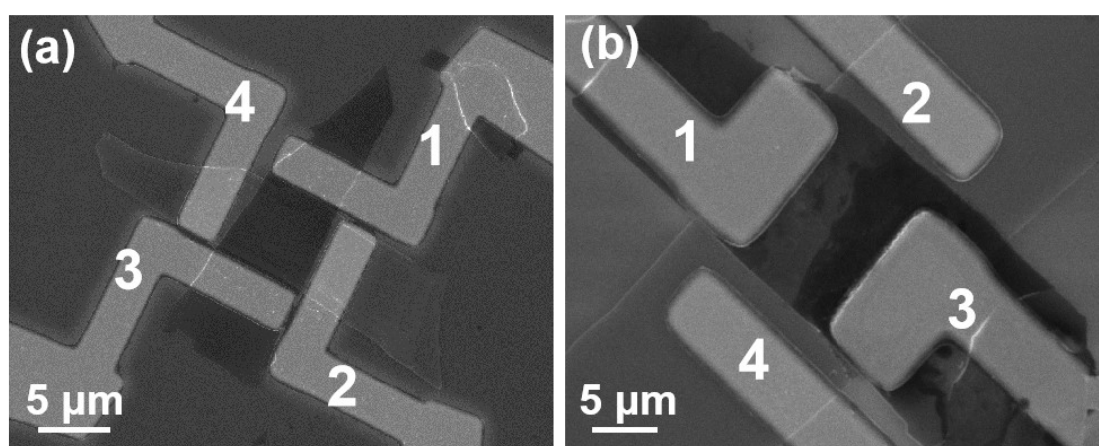

Fig.S1 SEM images of InSe/CCPS (a) device A; (b) device B.

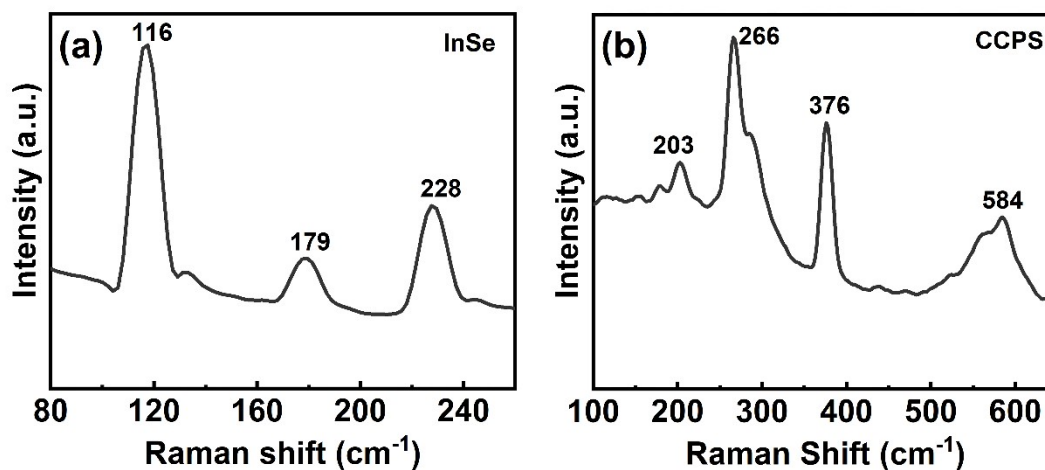

Fig.S2 Raman spectra of (a) InSe and (b) CCPS.

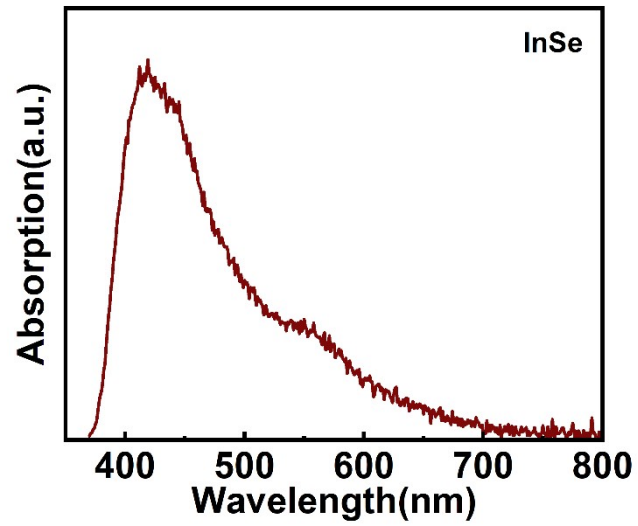

Fig.S3 Absorption spectrum of InSe

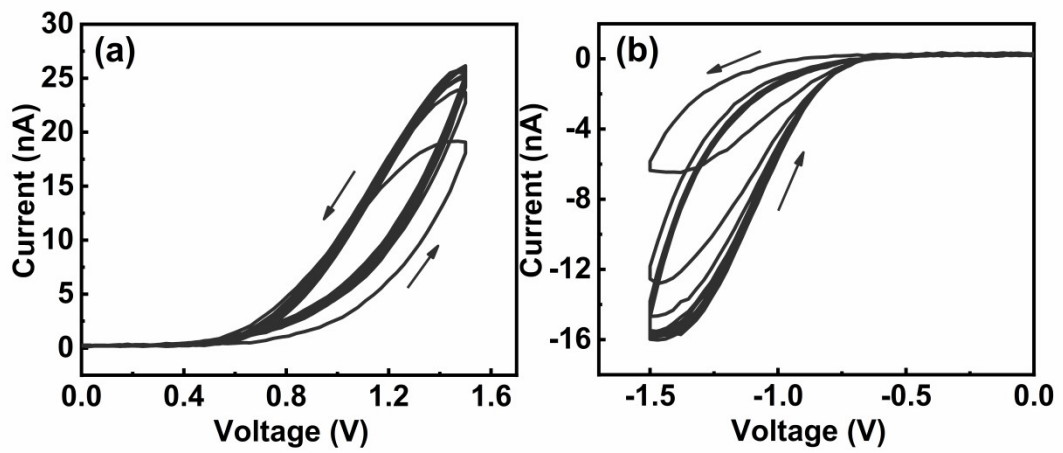

Fig.S4 Current-voltage (I-V) characteristics of the Au/CCPS/Au device with ten cycles of scanning: (a) from 0 to 1.5 V and then 1.5 to 0 V, and (b) from 0 to -1.5 V and then -1.5 to 0 V.

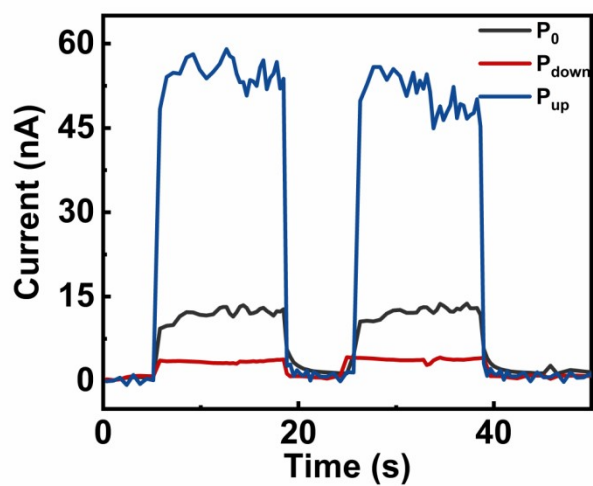

Fig.S5 Photo switching curves of device B at  $P_0$ ,  $P_{up}$  and  $P_{down}$  states (350 nm and a bias voltage of 3 V).

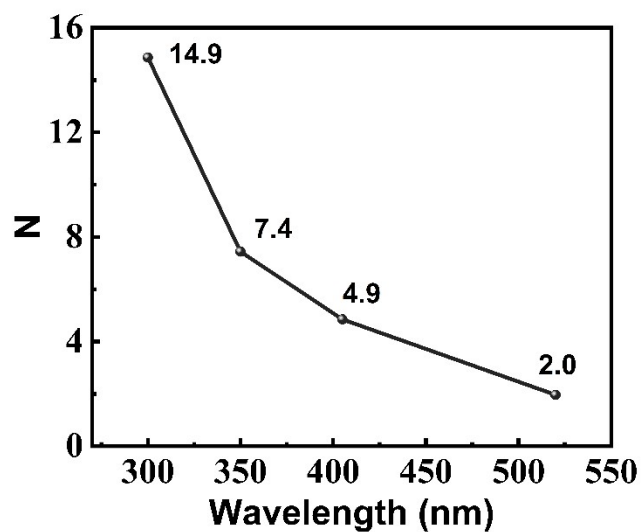

Fig.S6 Photocurrent ratio of  $P_{up}$  and  $P_{down}$  at different wavelengths
